# Supplementary material
Source: PubMed Central journal article supplement (PMC9087949)

## Supplemental Fig 1 and Fig 5 Uncropped images

Figure 1A Uncropped PCR images

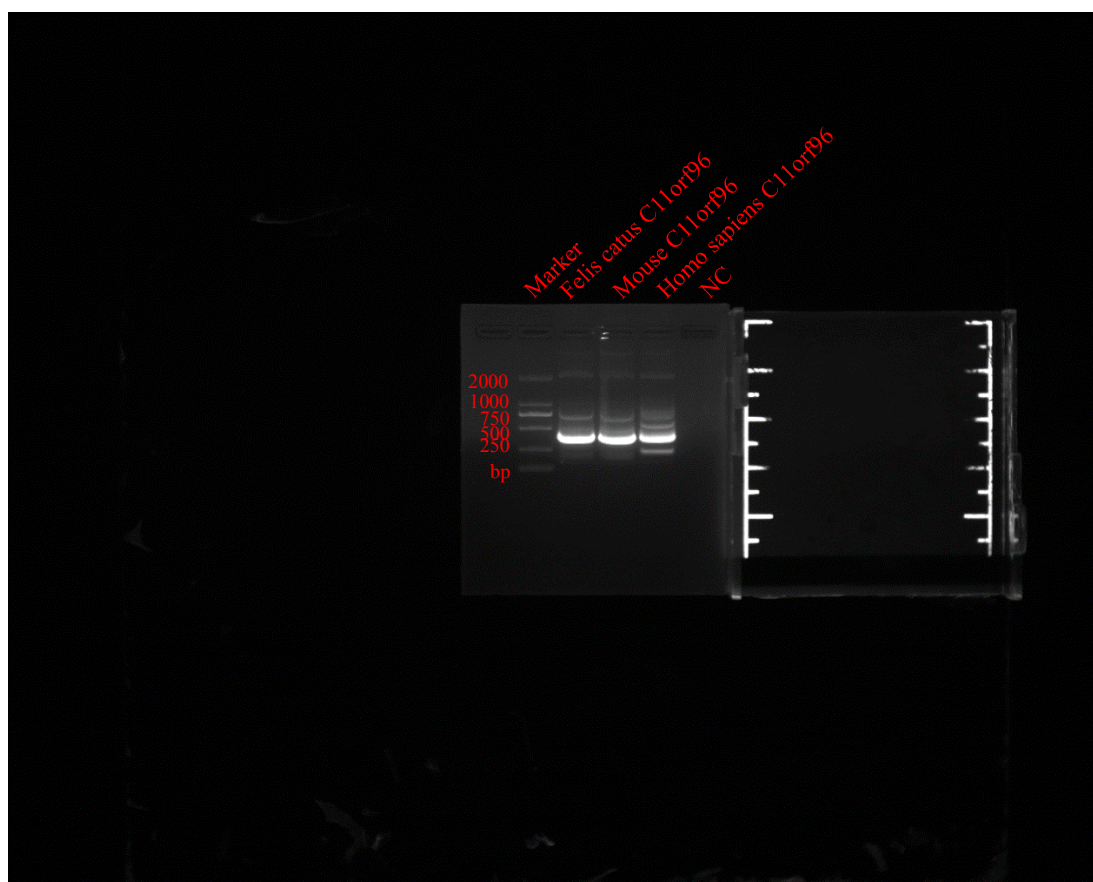

Figure 1B Uncropped WB images

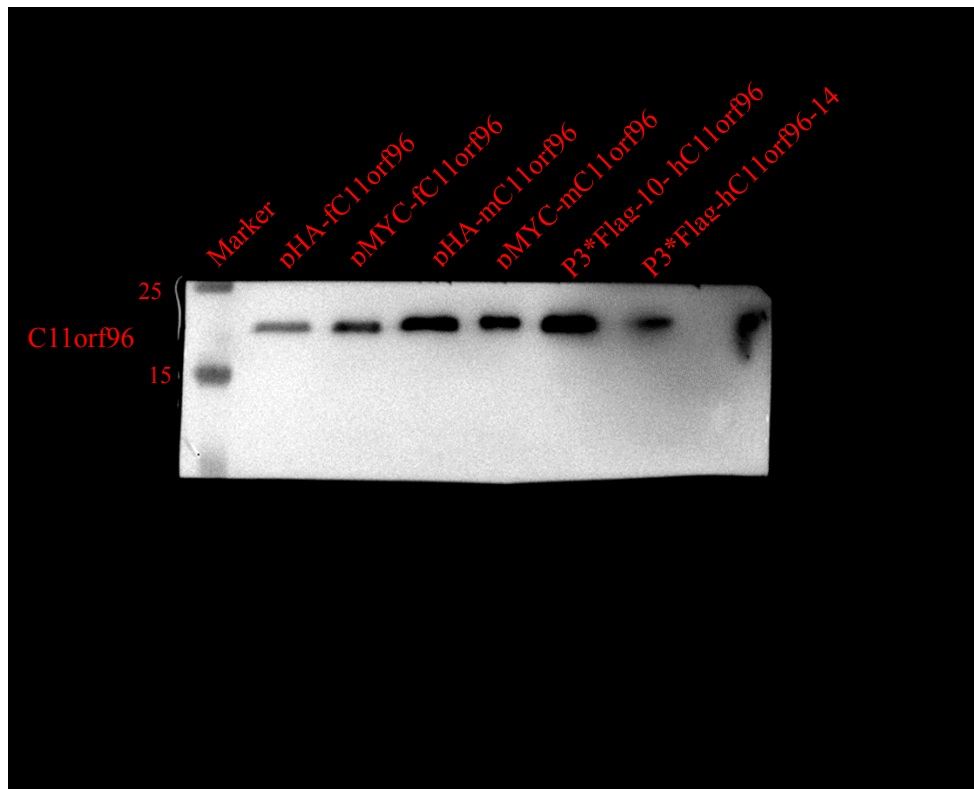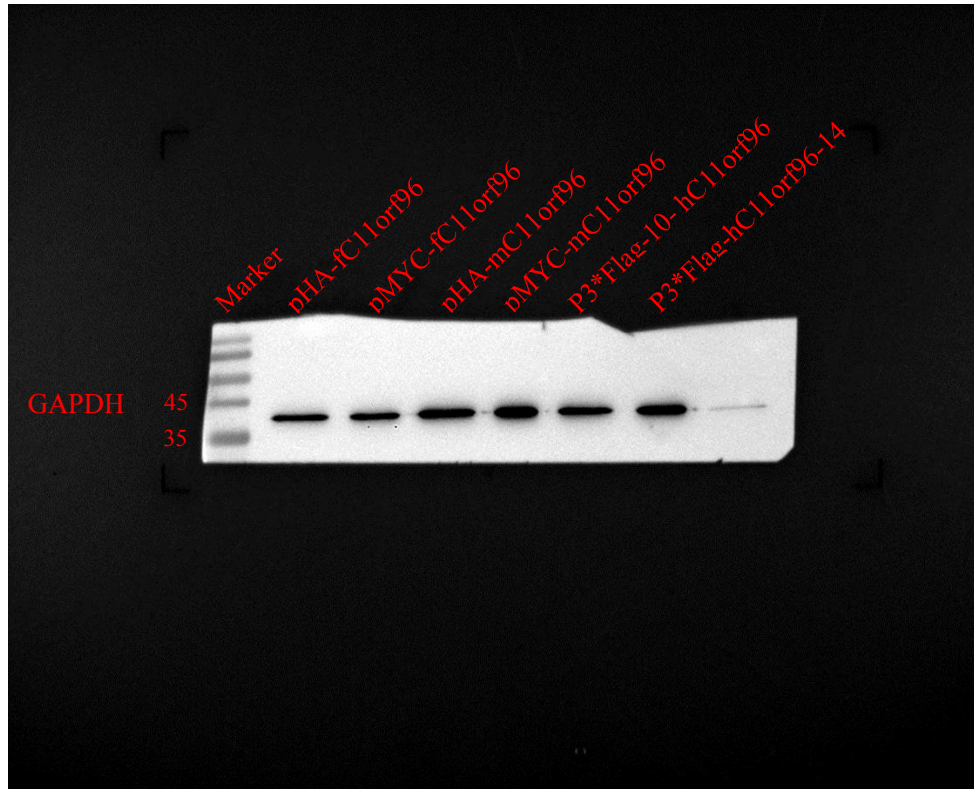

Figure 5D Uncropped WB images

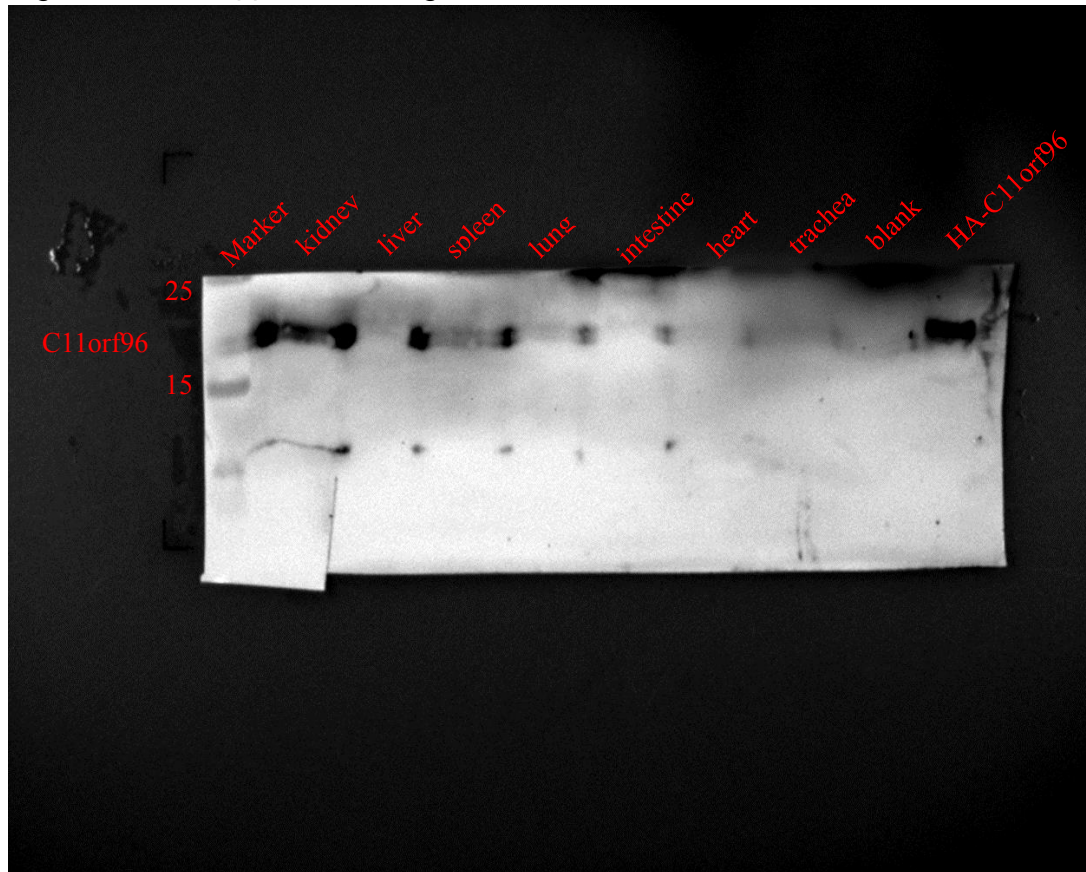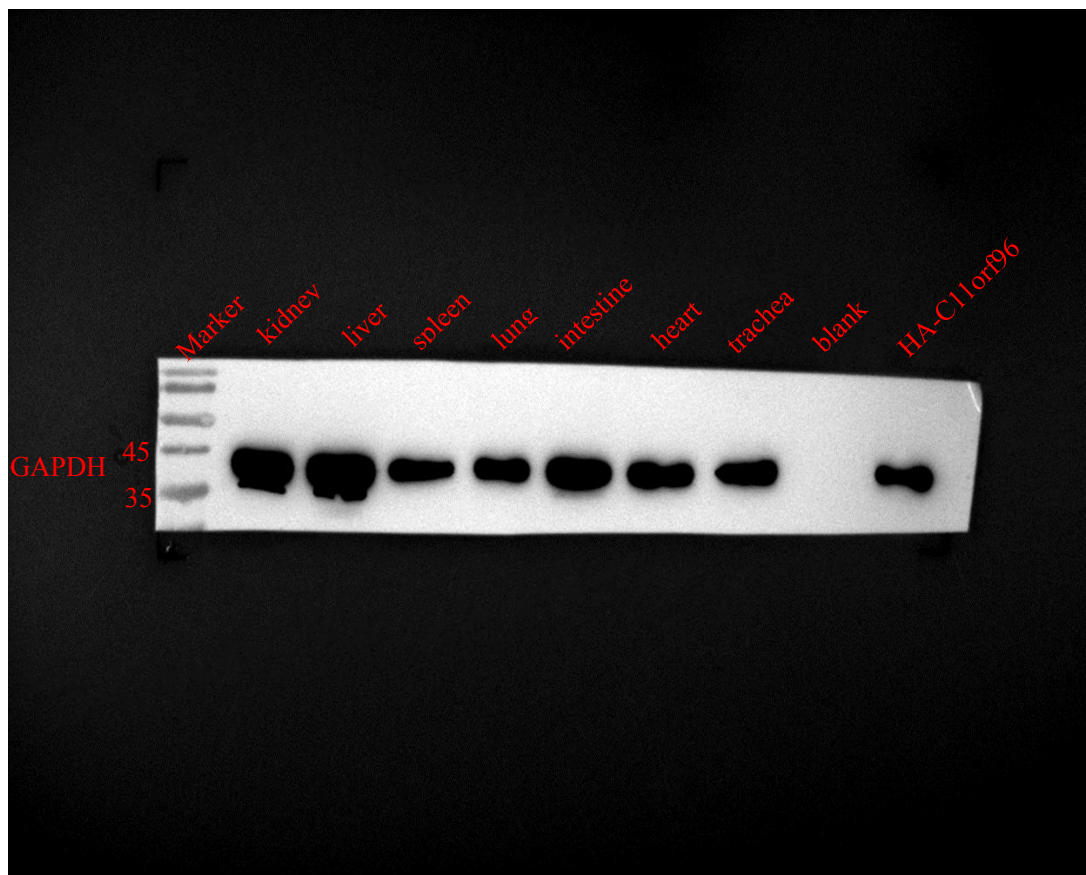

Supplement: 12917_2022_3224_MOESM1_ESM.pdf [file 12917_2022_3224_MOESM1_ESM.pdf]
